# Supplementary material for: Electrofluorescence switching from a multilayer thin film by spin-assisted layer-by-layer assembly of an anionic fluorescent conjugated polyelectrolyte with poly(diallyldimethylammonium chloride)
Source: Royal Society of Chemistry journal article supplement (doi:10.1039/c3cp53912a), 2013-10-26
Supplement: c3cp53912a.pdf [file c3cp53912a.pdf]

## Supporting Information

# Electrofluorescence Switching from Electrochemically Convertible A Multilayer Thin Film by Layer by Layer Assembly of Anionic Fluorescent Conjugated Polyelectrolyte with Poly(diallyldimethylammonium chloride)

Cheng-Po Kuo<sup>a</sup> and Man-kit Leung<sup>\* a,b</sup>

<sup>a</sup>Department of Chemistry, <sup>b</sup>Institute of Polymer Science and Engineering, National

Taiwan University, 1, Roosevelt Road Section 4, Taipei, Taiwan 106, ROC.

Correspondence to: M.-k. Leung (E-mail: [mkleung@ntu.edu.tw](mailto:mkleung@ntu.edu.tw))

|                                                                                                                  |    |
|------------------------------------------------------------------------------------------------------------------|----|
| Contents of Supporting Information.....                                                                          | 1  |
| <b>Figure S1.</b> <sup>1</sup> H NMR Spectrum (400 MHz, DMSO-d <sub>6</sub> ) of <b>1</b> .....                  | 2  |
| <b>Figure S2.</b> <sup>13</sup> C NMR Spectrum (100 MHz, DMSO-d <sub>6</sub> ) of <b>1</b> .....                 | 3  |
| <b>Figure S3.</b> <sup>1</sup> H NMR Spectrum of (400 MHz, CDCl <sub>3</sub> ) <b>2</b> .....                    | 4  |
| <b>Figure S4.</b> <sup>13</sup> C NMR Spectrum (100 MHz, CDCl <sub>3</sub> ) of <b>2</b> .....                   | 5  |
| <b>Figure S5.</b> <sup>1</sup> H NMR Spectrum (400 MHz, CDCl <sub>3</sub> ) of <b>3</b> .....                    | 6  |
| <b>Figure S6.</b> <sup>13</sup> C NMR Spectrum (100 MHz, CDCl <sub>3</sub> ) of <b>3</b> .....                   | 7  |
| <b>Figure S7.</b> <sup>1</sup> H NMR Spectrum (400 MHz, CD <sub>3</sub> OD) of <b>PFTSO<sub>3</sub>Na</b> .....  | 8  |
| <b>Figure S8.</b> <sup>13</sup> C NMR Spectrum (100 MHz, CD <sub>3</sub> OD) of <b>PFTSO<sub>3</sub>Na</b> ..... | 9  |
| Contrast experiments for the switching rate study, using <b>PFTU</b> as a standard for comparison.....           | 10 |

Figure S1.  $^1\text{H}$  NMR Spectrum of **1**

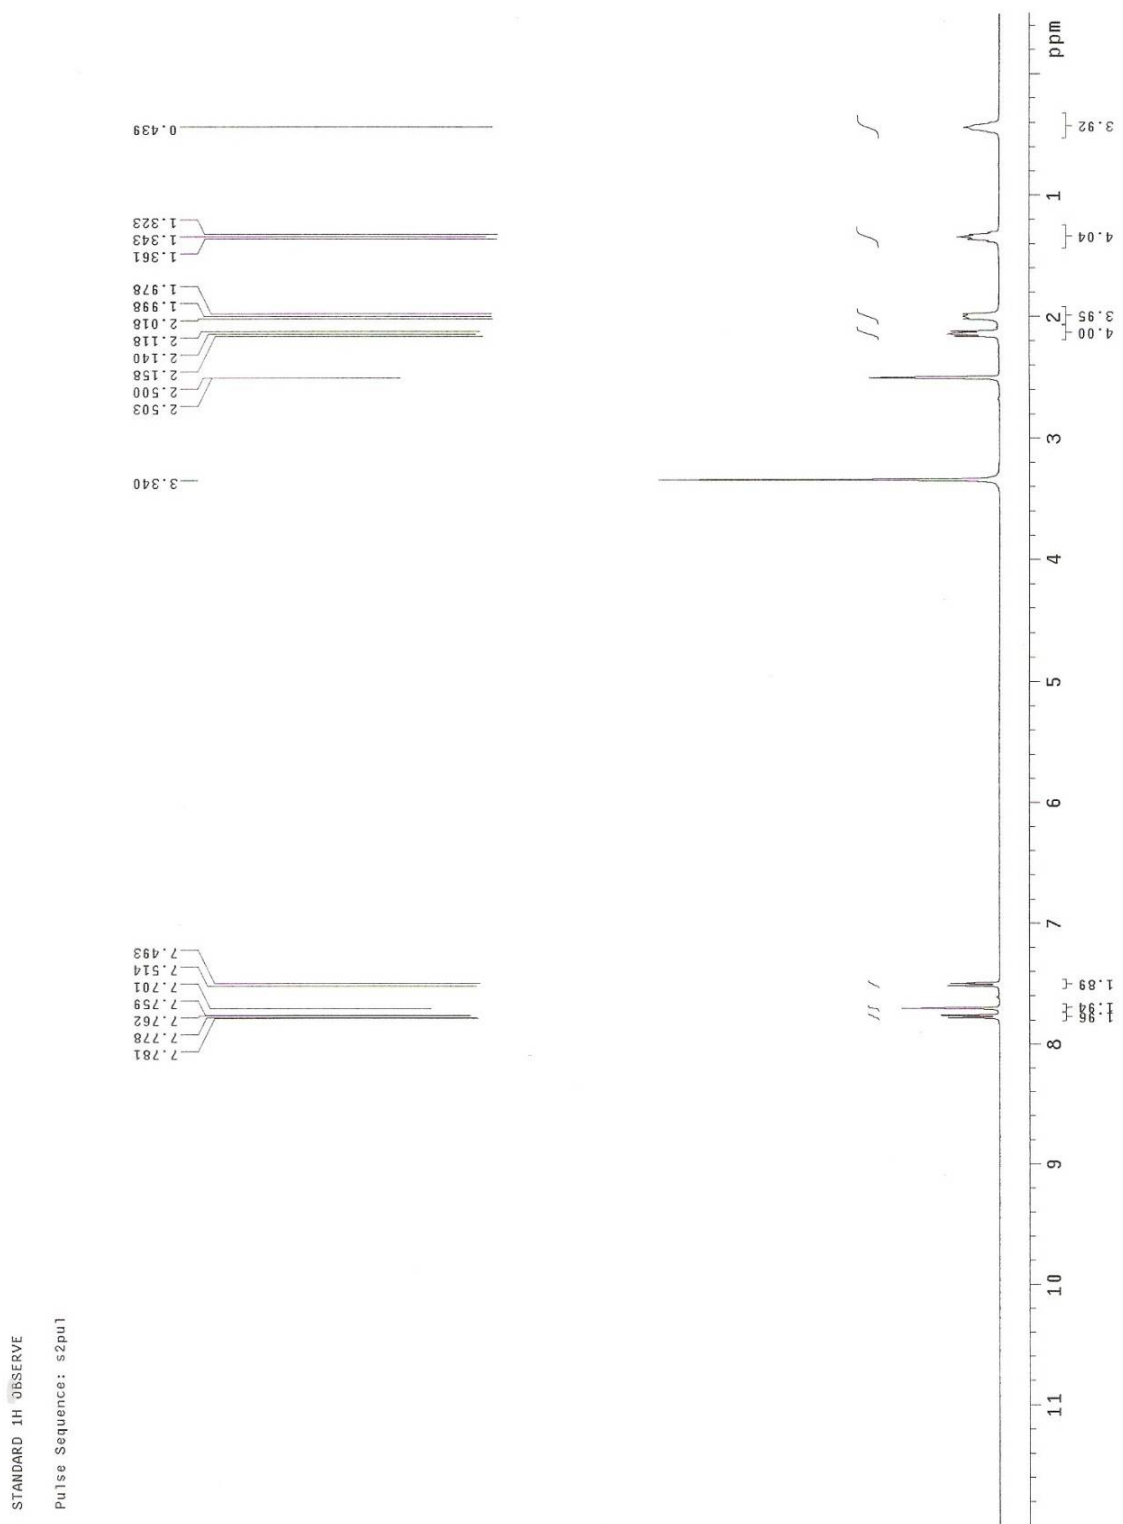

Figure S2.  $^{13}\text{C}$  NMR Spectrum of **1**

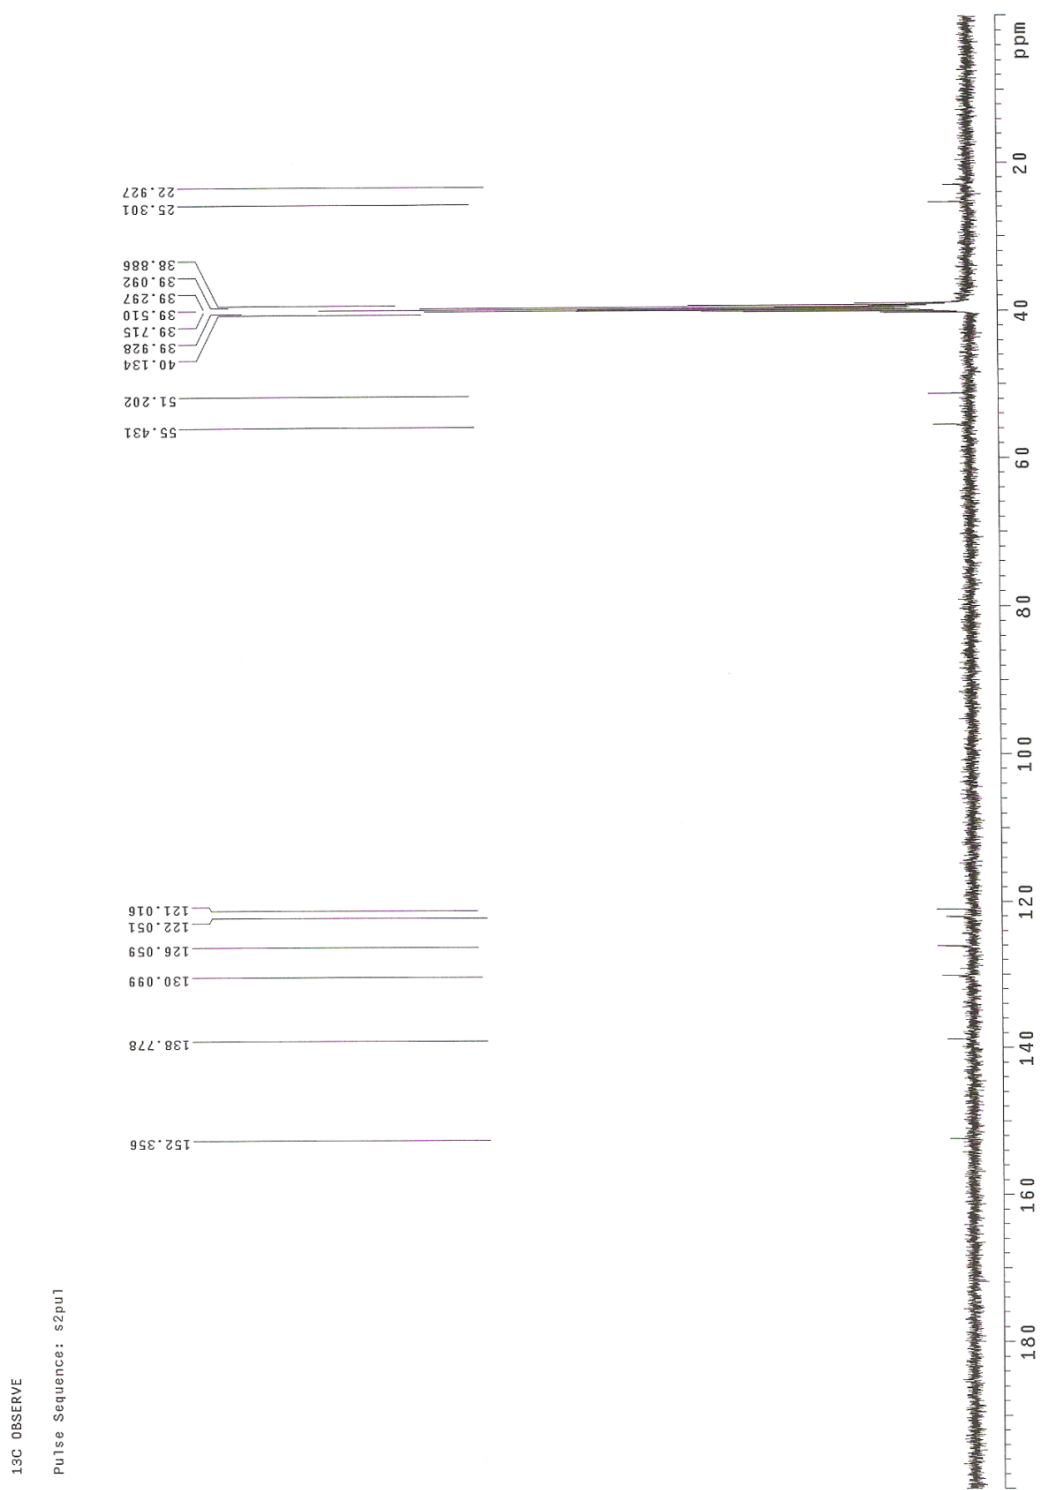

Figure S3.  $^1\text{H}$  NMR Spectrum of **2**

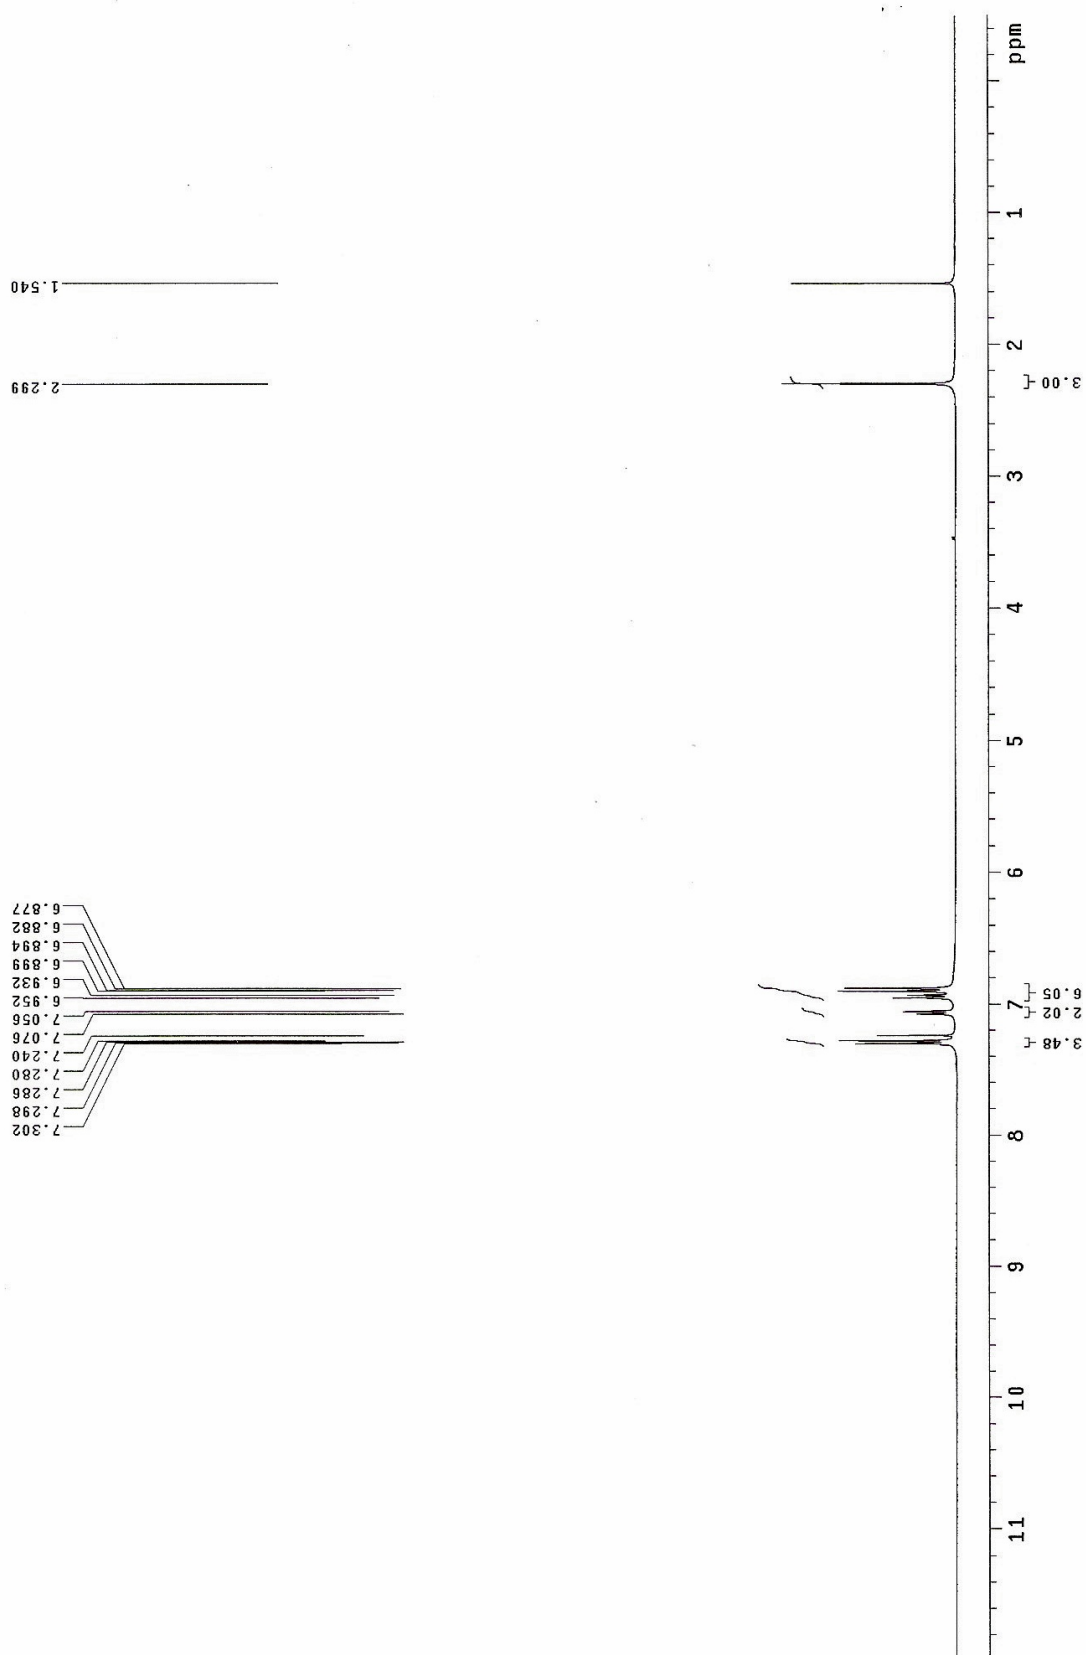

Figure S4.  $^{13}\text{C}$  NMR Spectrum of **2**

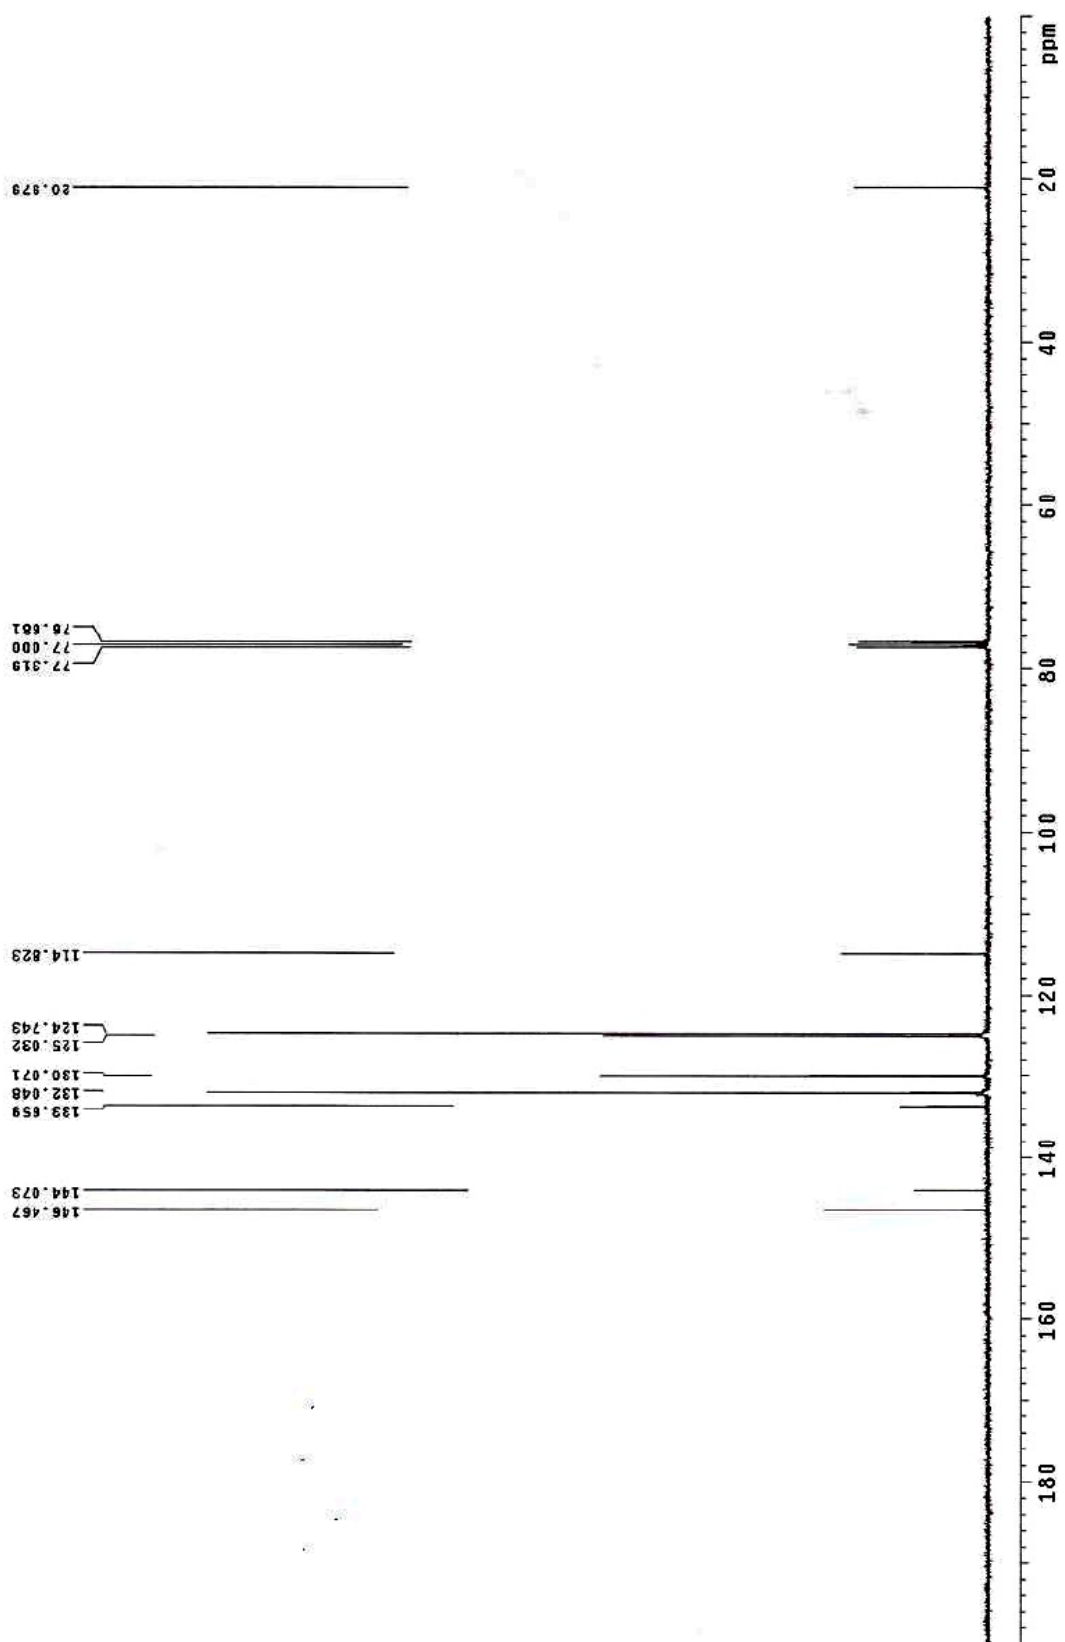

Figure S5.  $^1\text{H}$  NMR Spectrum of **3**

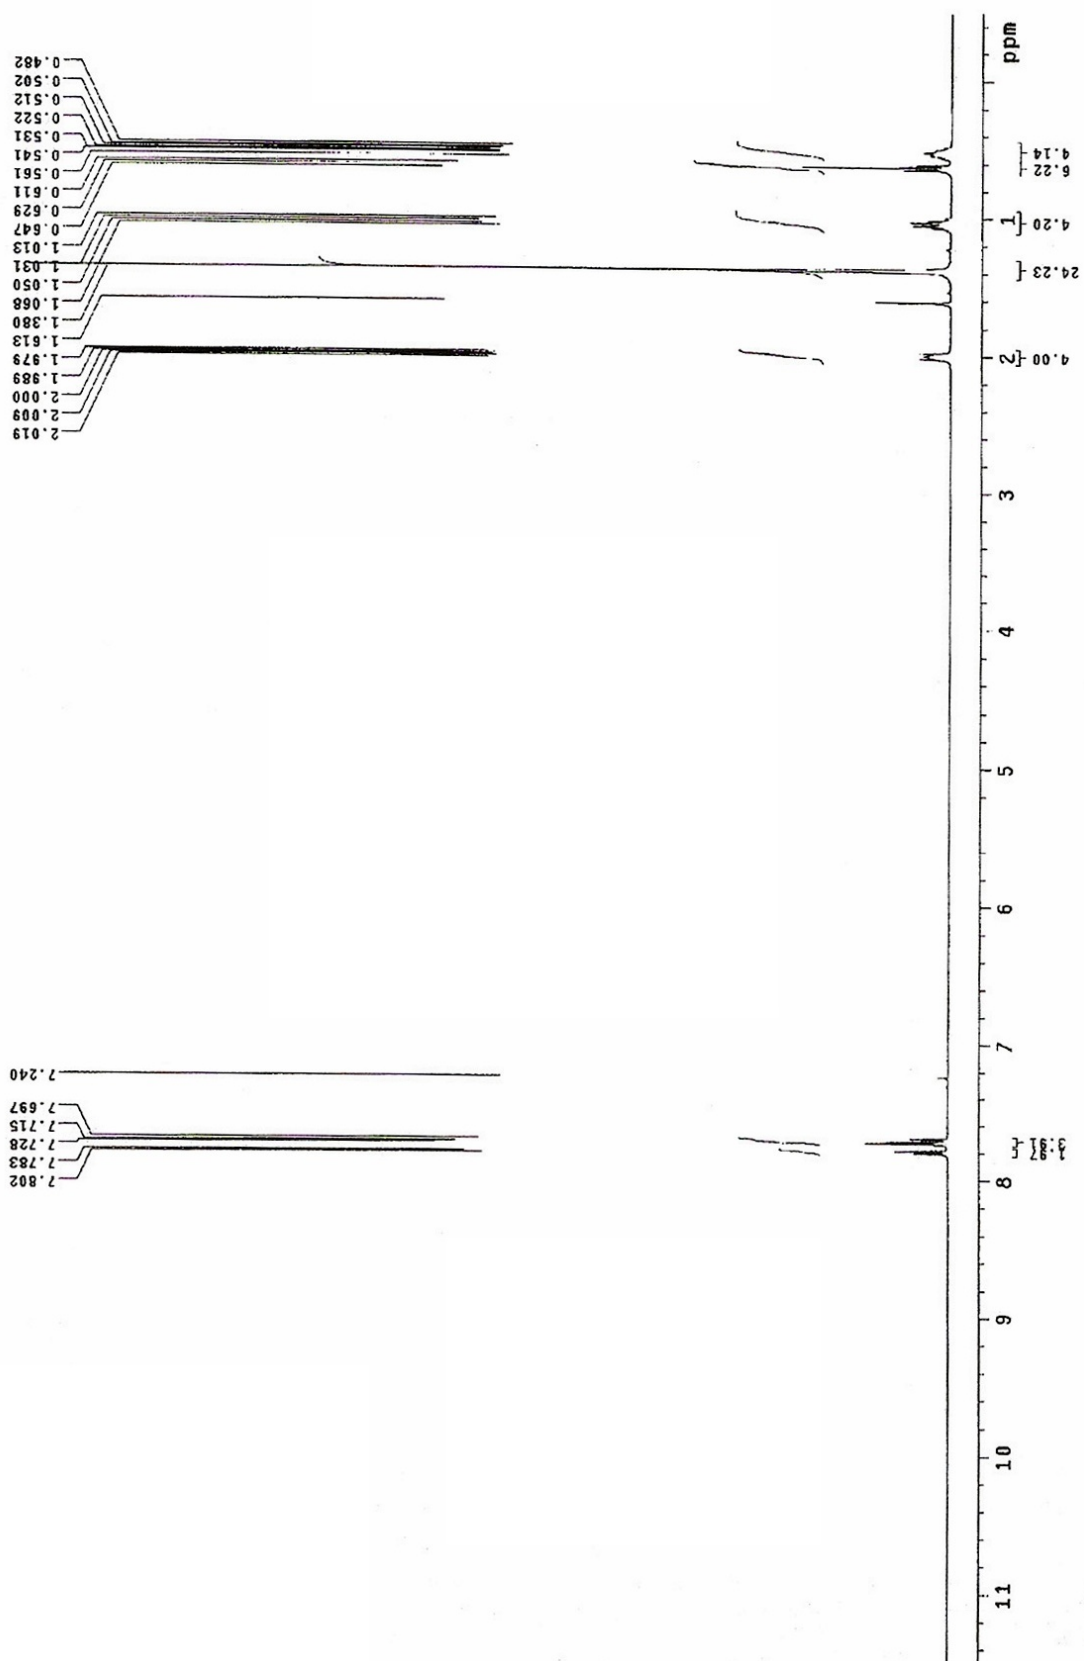

Figure S6.  $^{13}\text{C}$  NMR Spectrum of **3**

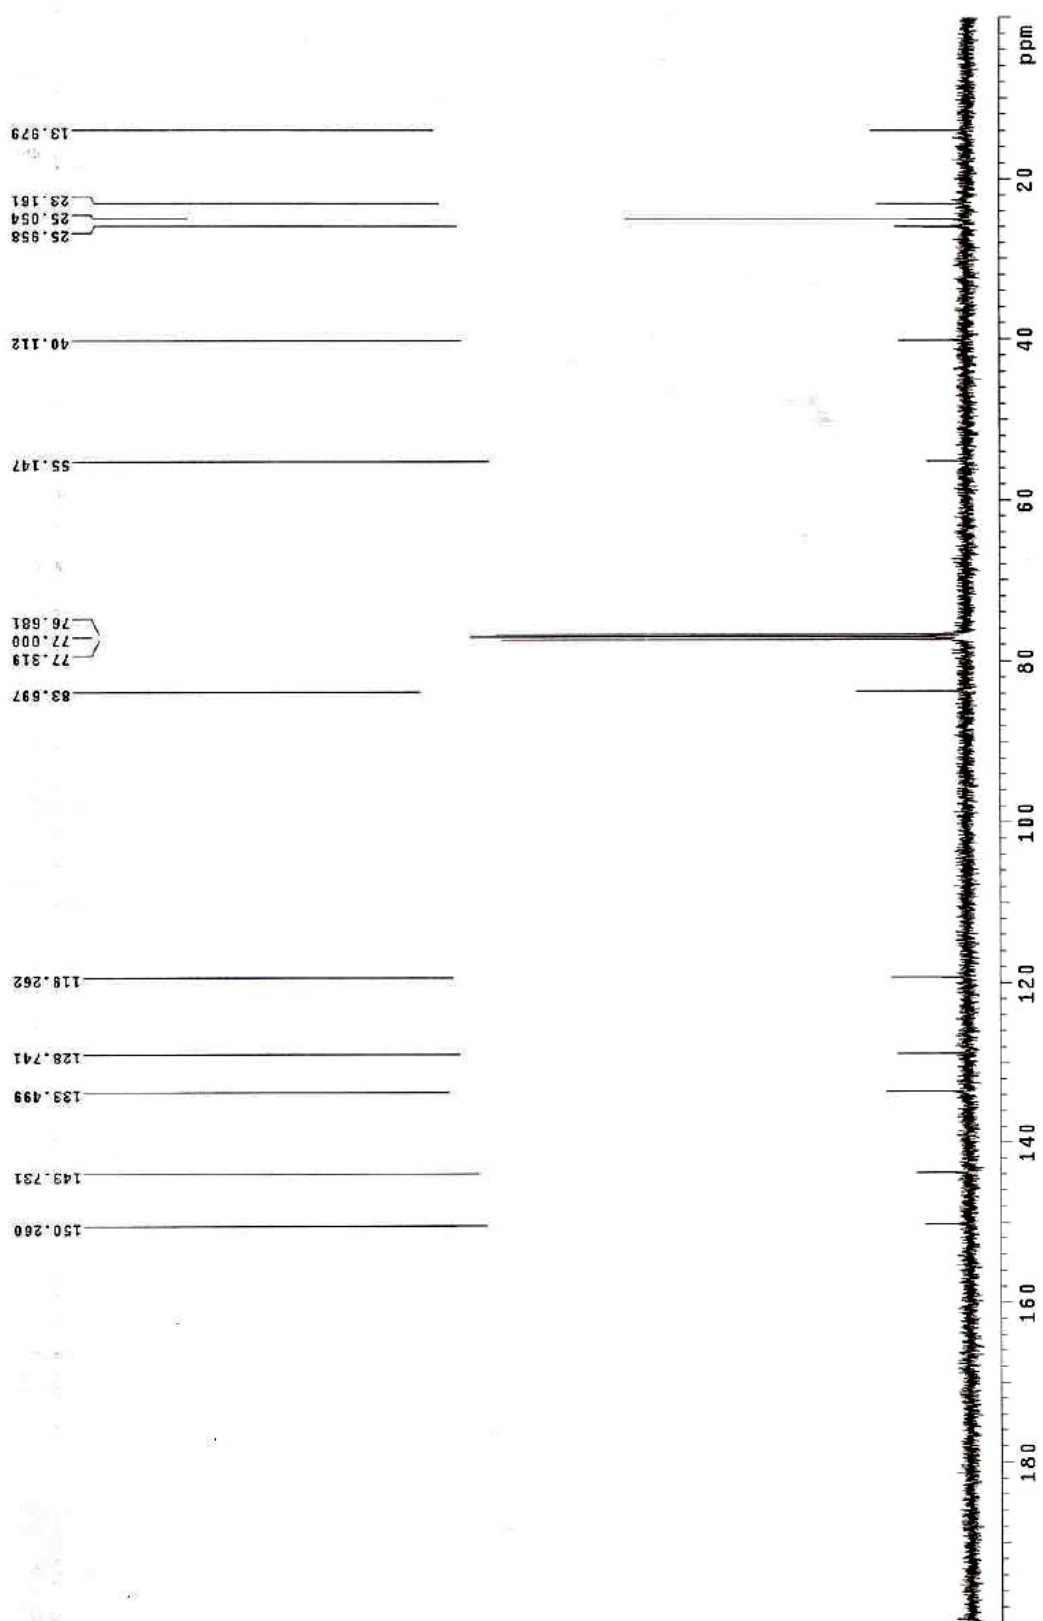

Figure S7.  $^1\text{H}$  NMR Spectrum of  $\text{PFTSO}_3\text{Na}$

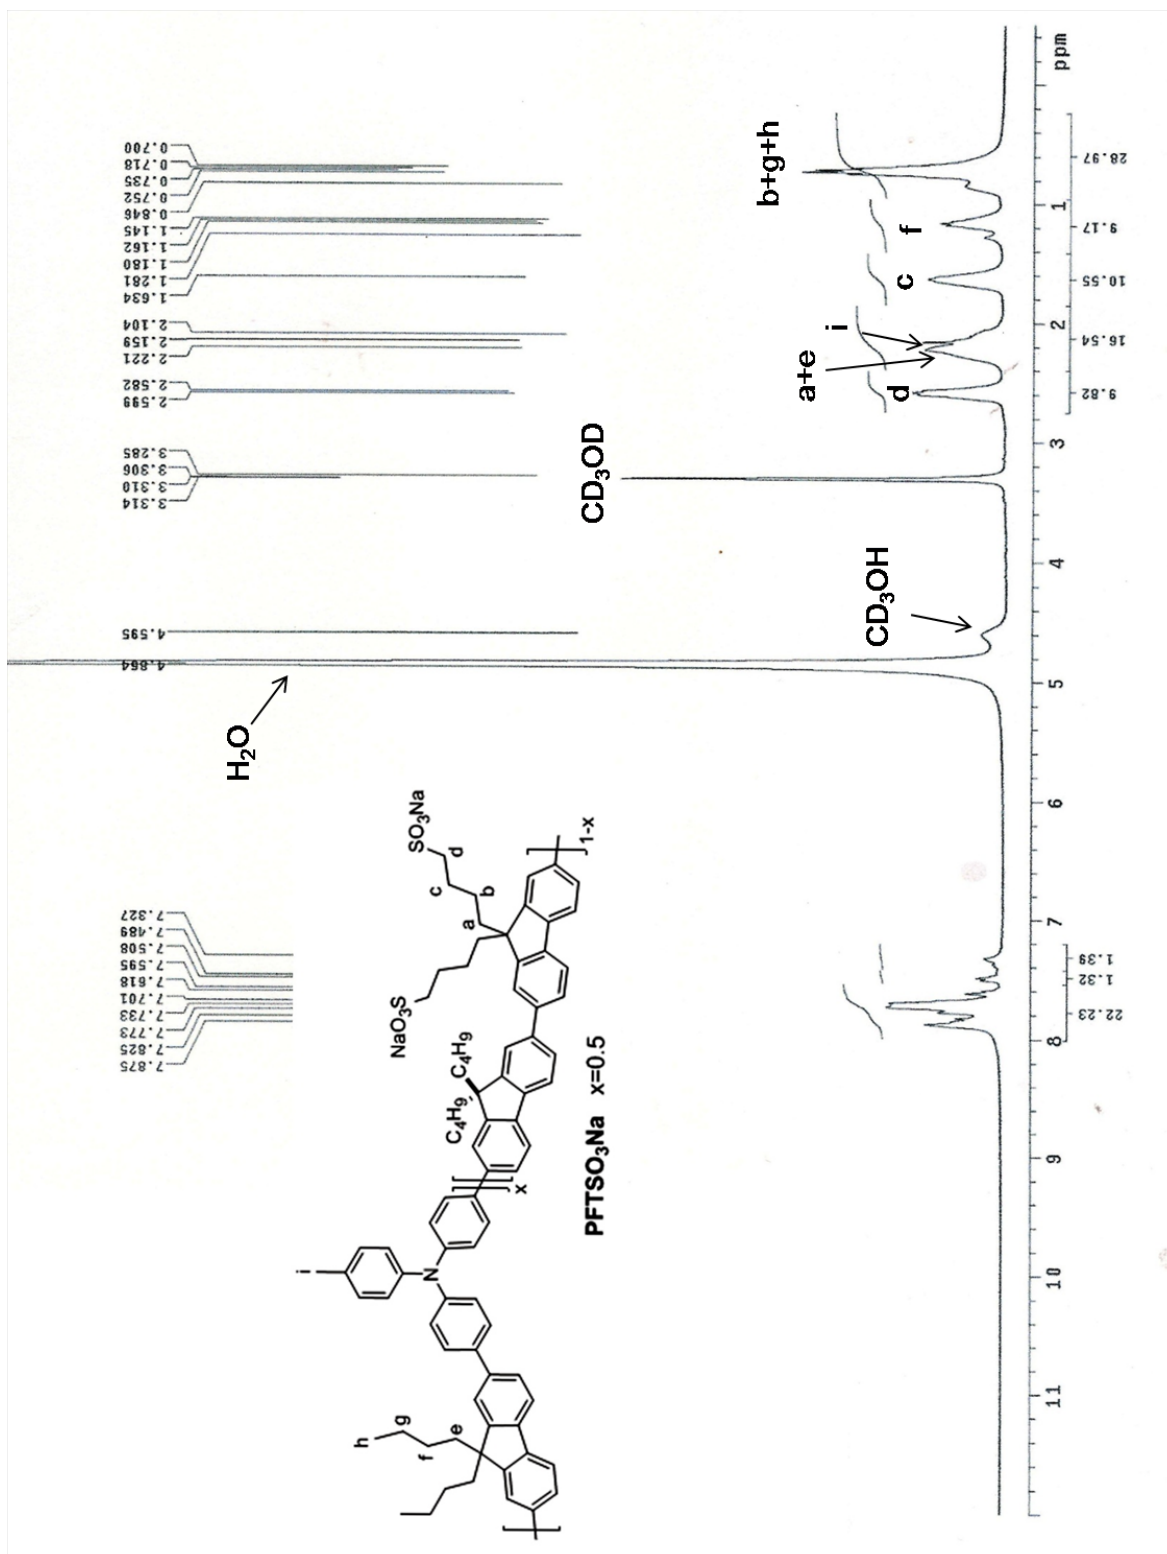



Figure S8.  $^{13}\text{C}$  NMR Spectrum of  $\text{PFTSO}_3\text{Na}$

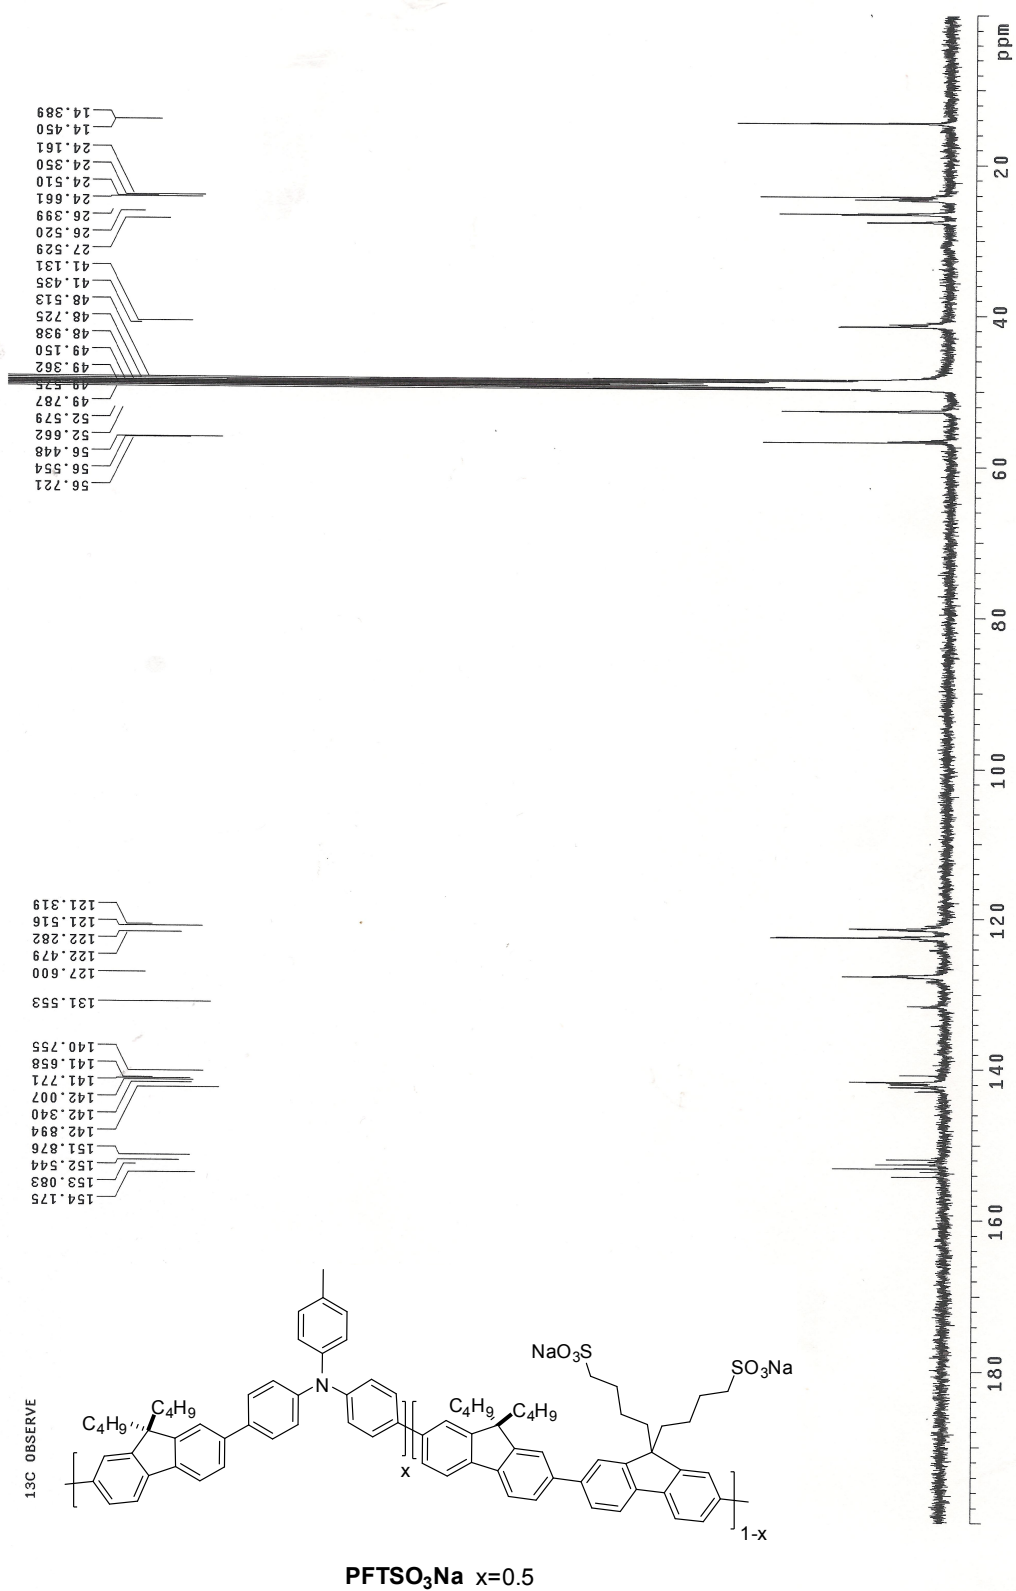

## Contrast experiments for the switching rate study, using PFTU as a standard for comparison

**Fabrication of a PFTU EF device.** The electrofluorescent film was prepared by spin-coating (5000 rpm, 60 s) a solution of **PFTU** ( $10 \text{ mg mL}^{-1}$  in  $\text{CHCl}_3$ ) onto an ITO-coated glass substrate and dried under vacuum at  $80^\circ\text{C}$  for 5 min. In our study, this layer also possessed a switching mechanism as well as photoluminescence. Another layer of the gel electrolyte prepared from PPC (1.0 g),  $\text{LiClO}_4$  (0.15 g) and PC (3.0 g), and heated at  $60^\circ\text{C}$  to obtain a homogeneous and transparent gel, was spread on top. The device was then sandwiched with another piece of ITO electrode and sealed with epoxy resin.

To further understand the EFD behavior of  $(\text{PFTSO}_3\text{Na/PDDA})_n$ , an EFD based on **PFTU** (Scheme S1), our previously reported EFD polymer, was fabricated under the same conditions for comparison. The thickness of  $70\pm 5 \text{ nm}$  for the **PFTU** was measured by an alpha-step instrument. This value is slightly larger than that of  $43\pm 5 \text{ nm}$  for  $(\text{PFTSO}_3\text{Na/PDDA})_{20}$  but still in the same order of magnitude.

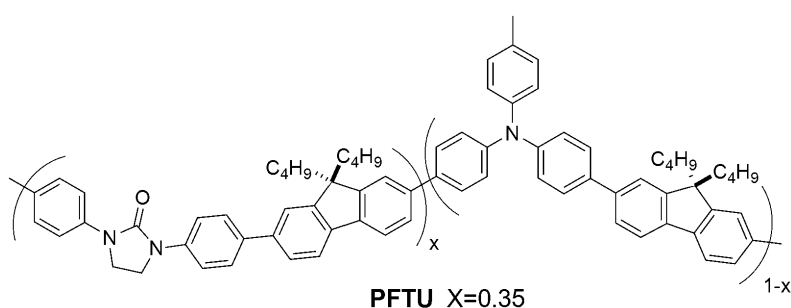

**Scheme S1.** Structural formula of **PFTU**.

Figure S9 shows the results from the contrast **PFTU** device. The device showed an

on-to-off switching time of 3.53 s at 1.0 V and an off-to-on switching time of 6.06 s at -1.0 V. Although the on-to-off switching times for the  $(\text{PFTSO}_3\text{Na}/\text{PDDA})_{20}$  and **PFTU** EFDs are very similar, the off-to-on switching time of 6.06 s for the **PFTU** EFD is obviously much slower than that of 1.88 s for  $(\text{PFTSO}_3\text{Na}/\text{PDDA})_{20}$ . Furthermore, their fluorescence resumption profiles are very different; an induction period of 5 seconds was undoubtedly observed for **PFTU**. On the contrary, the induction period has not been observed for  $(\text{PFTSO}_3\text{Na}/\text{PDDA})_{20}$  in Figure 10b. This result suggests that the interpenetrating **PFTSO**<sub>3</sub>**Na/PDDA** polymer network not only shows high conductivity for the TAA radical cations and the bications but also allows the  $\text{ClO}_4^-$  counter-anions to migrate and effectively diffuse back to the gel-electrolyte under the applied reverse bias of -1.0 V during the off-to-on (de-doped) process.

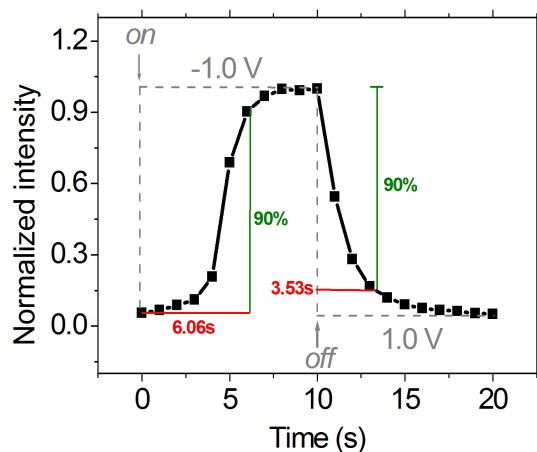

**Figure S9.** Electrofluorescence switching time profile of the **PFTU** device at 435 nm with the electrical voltage bias of  $\pm 1.0$  V.
